# Supplementary material for: Unveiling Comparative Genomic Trajectories of Selection and Key Candidate Genes in Egg-Type Russian White and Meat-Type White Cornish Chickens
Source: MDPI journal article supplement (doi:10.3390/biology10090876), 2021-09-06

Chromosome 1

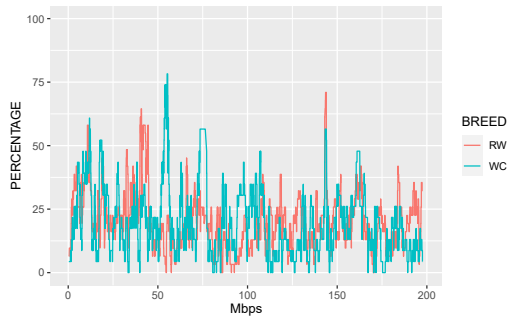

Chromosome 2

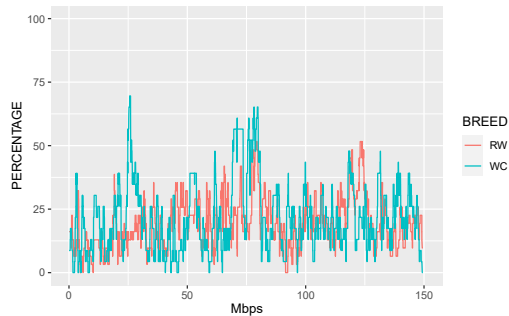

Chromosome 3

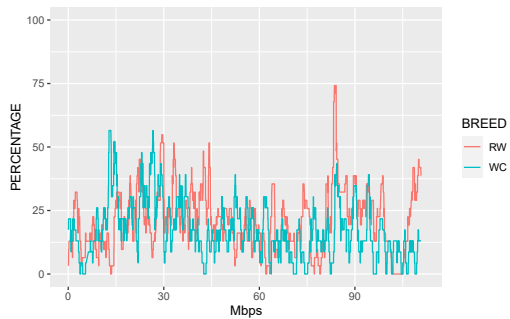

Chromosome 4

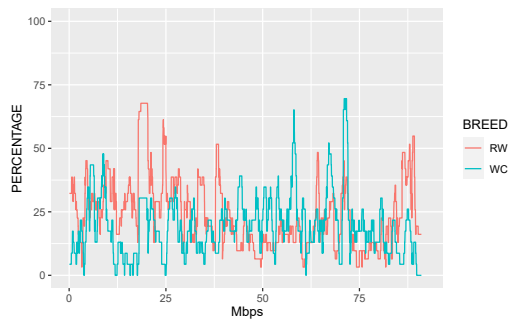

Chromosome 5

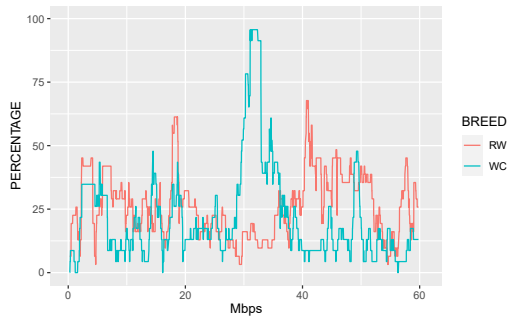

Chromosome 8

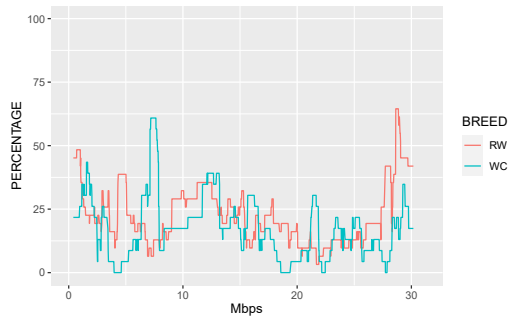

Chromosome 9

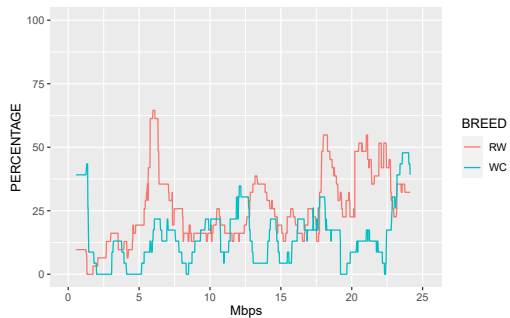

Chromosome 18

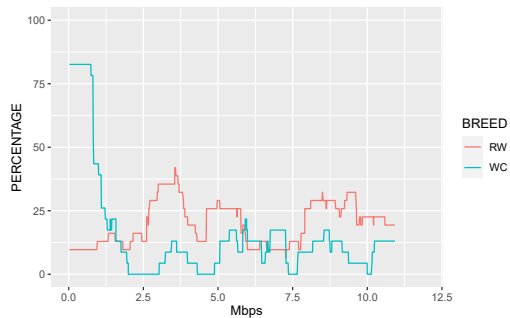

Supplement: s1 [file s1]
