# Supplementary figures and images for: Unveiling Comparative Genomic Trajectories of Selection and Key Candidate Genes in Egg-Type Russian White and Meat-Type White Cornish Chickens
Source: MDPI journal article supplement (doi:10.3390/biology10090876), 2021-09-06

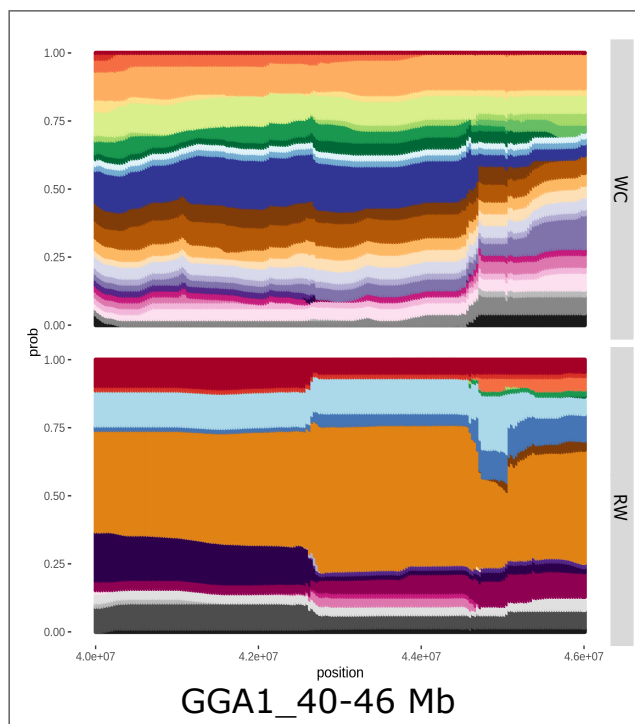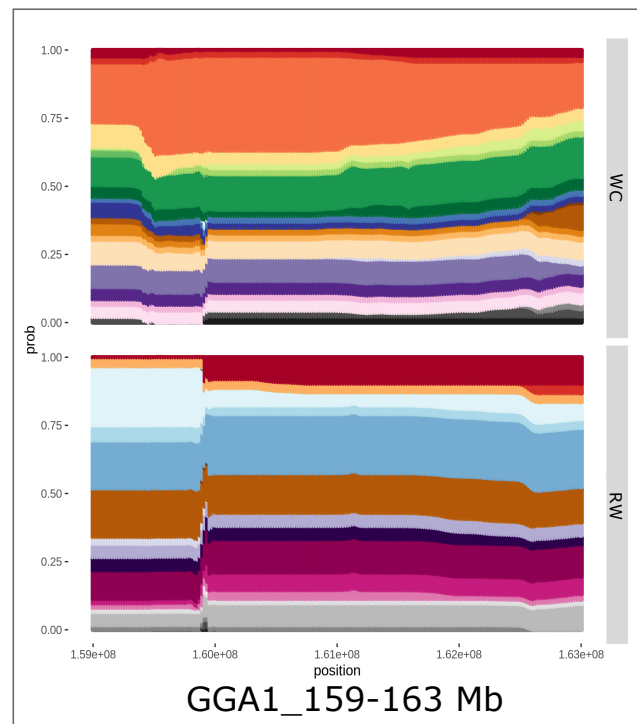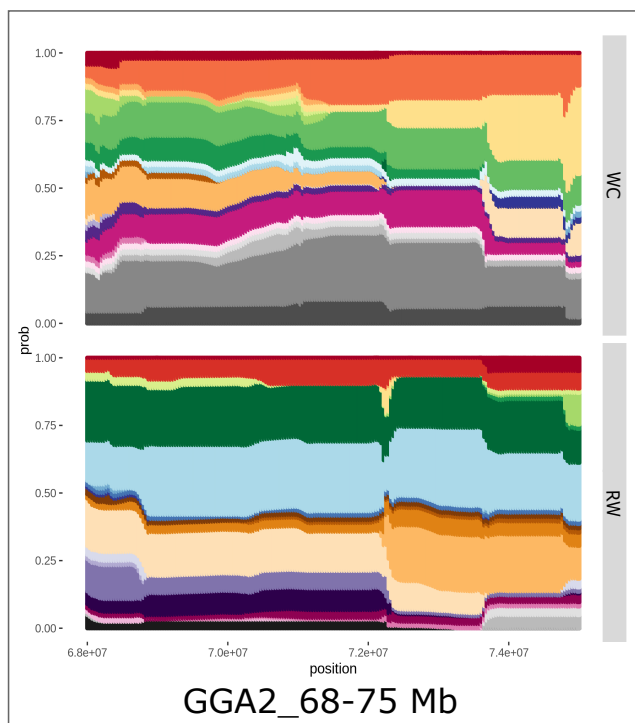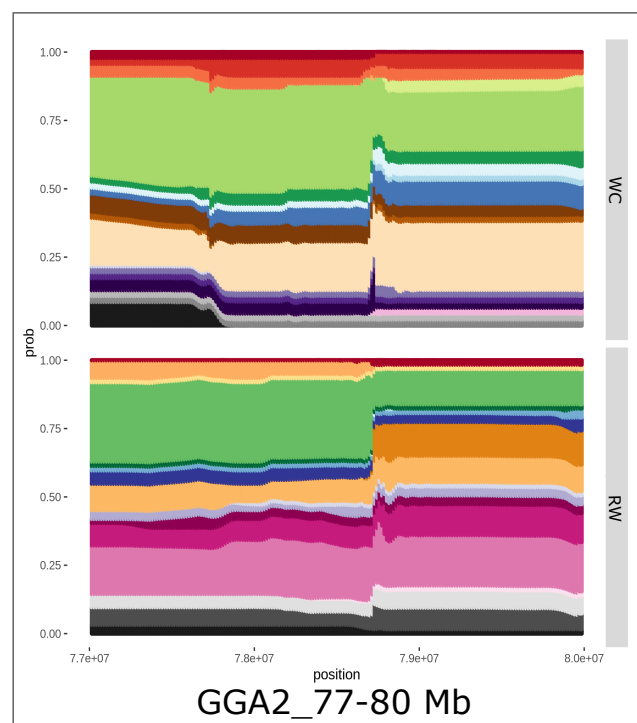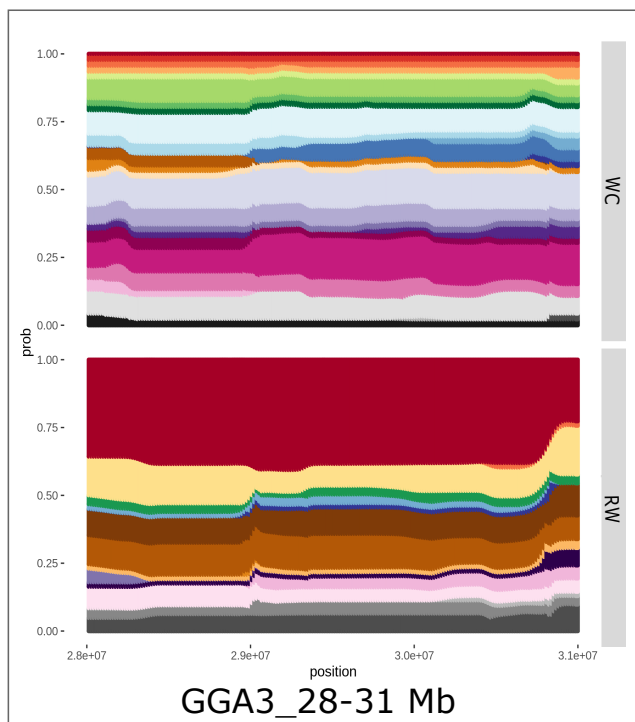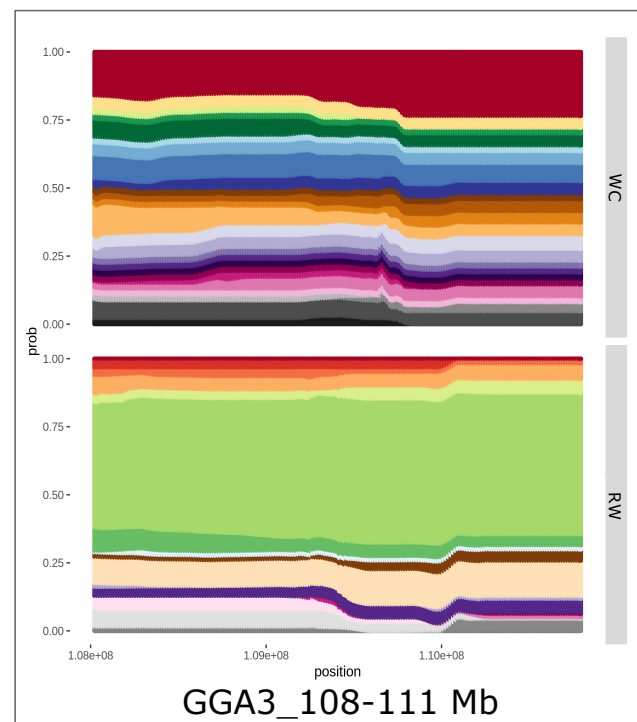

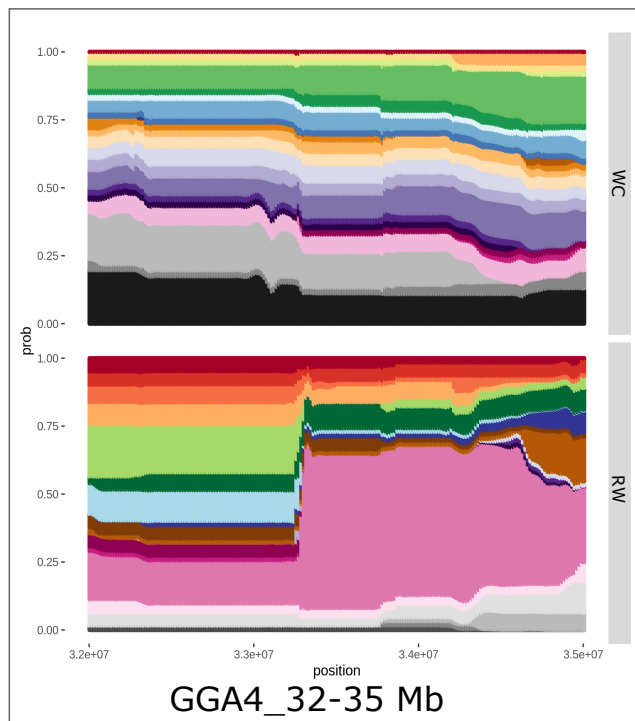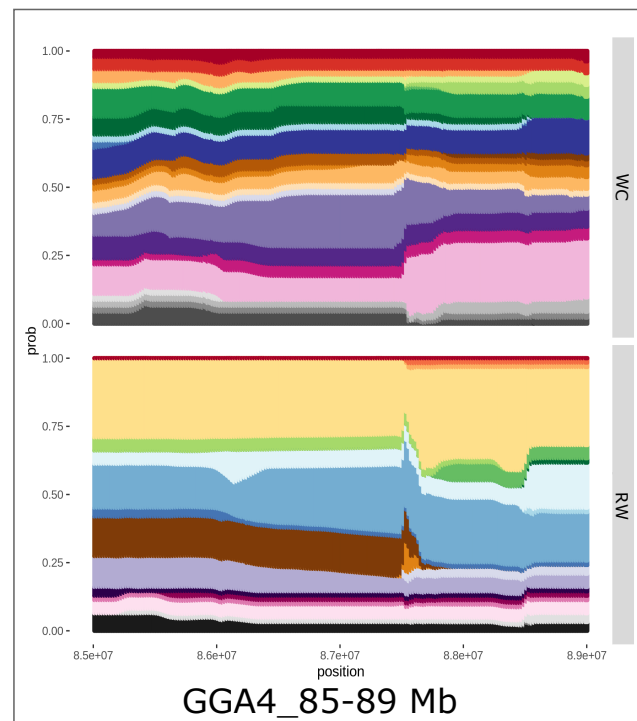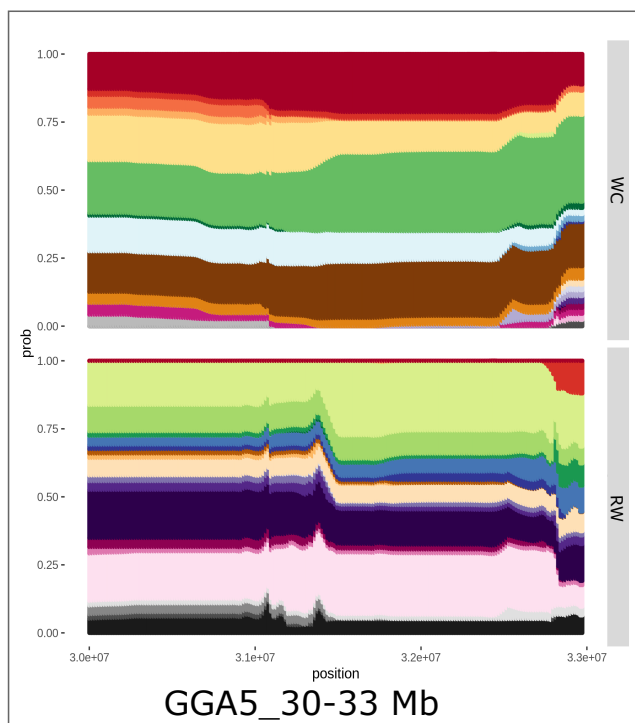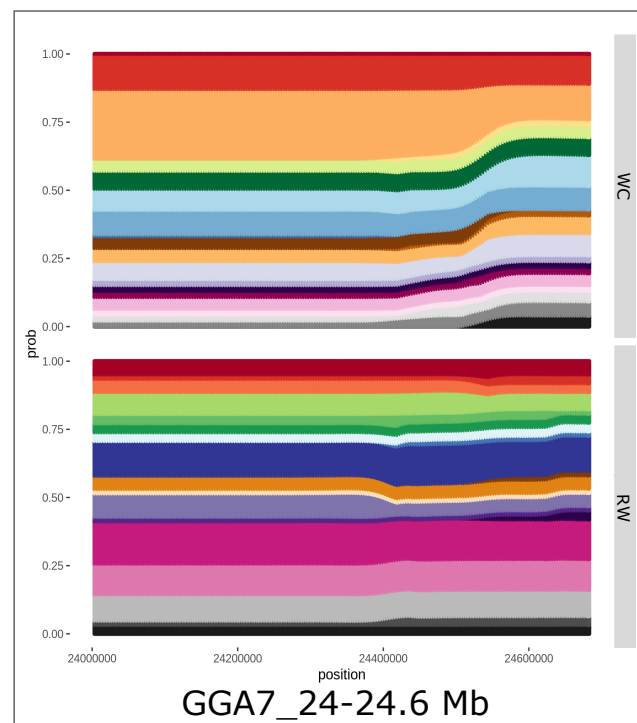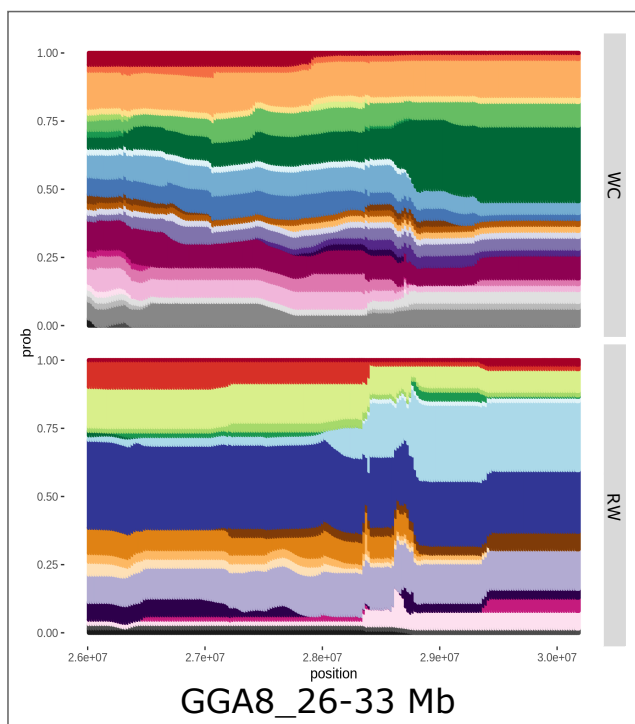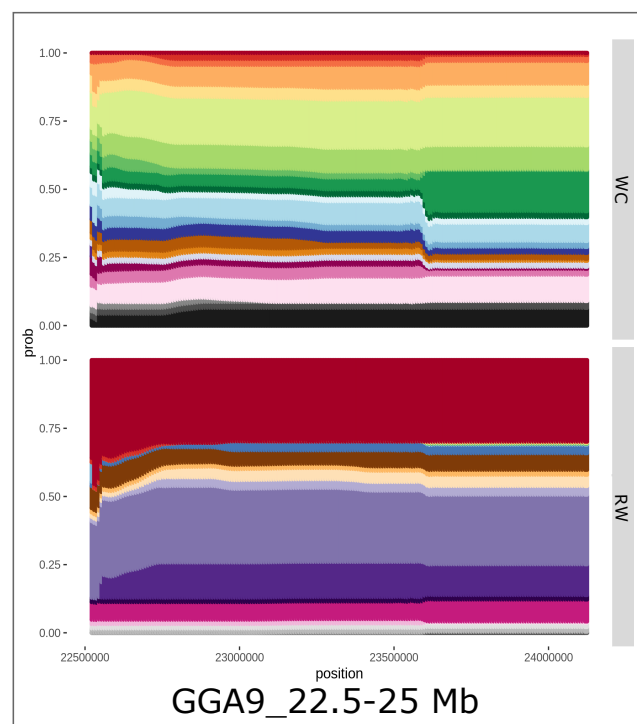

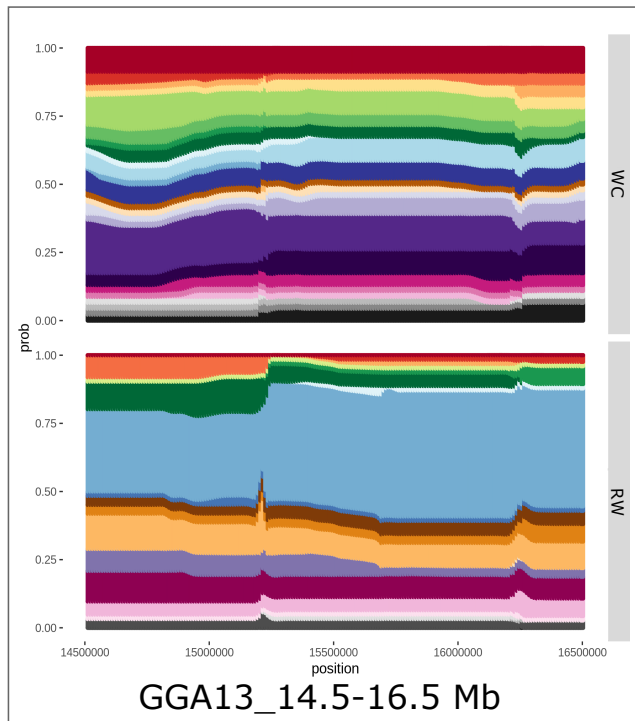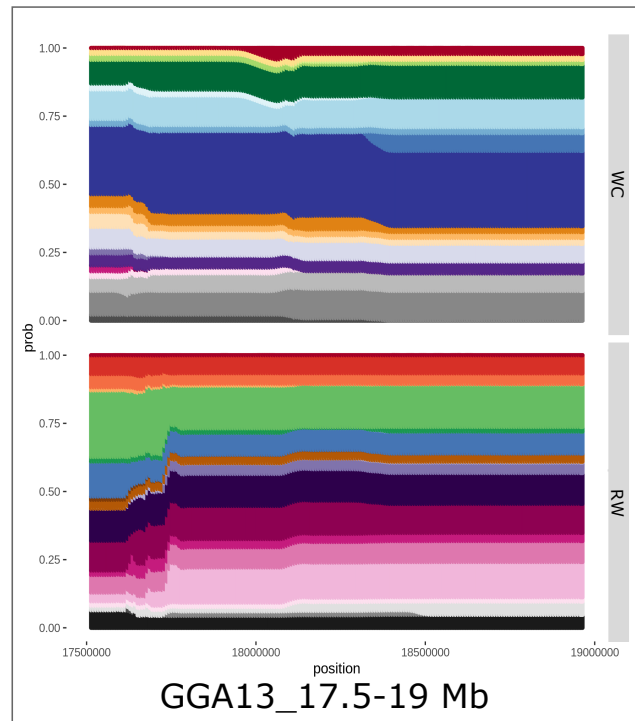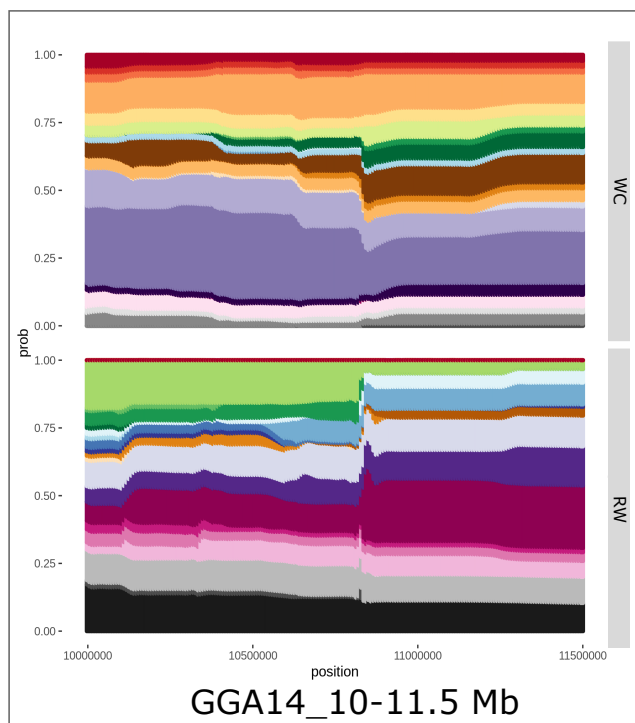

Supplement: s1 [file s1]
